# Supplementary material for: A facile technique for automatically counting odor-producing algae (Pseudanabaena sp.) in drinking water sources
Source: Royal Society of Chemistry journal article supplement (doi:10.1039/d1ew00101a), 2021-01-01
Supplement: d1ew00101a1.pdf [file d1ew00101a1.pdf]

## **A facile technique for automatically counting odor-producing algae (*Pseudanabaena* sp.) in drinking water sources**

### ***Supplementary Information***

Sandrine Boivin<sup>a</sup>, Eri Hasegawa<sup>b</sup>, Dabide Yamaguchi<sup>b</sup>, Takahiro Fujioka<sup>a,\*</sup>

<sup>a</sup>*Graduate School of Engineering, Nagasaki University, 1-14 Bunkyo-machi,  
Nagasaki 852-8521, Japan*

<sup>b</sup>*Metawater Co. Ltd., 1-25 Kandasuda-cho, Chiyoda-ku, Tokyo 101-0041, Japan*

---

\* Corresponding author: Takahiro Fujioka, Email: tfujioka@nagasaki-u.ac.jp, Ph. +81 95 819 2695

**Table S1** Water quality of samples collected from Lake Y (May 24<sup>th</sup>, 2019 – September 20<sup>th</sup>, 2019).

| Day  | Temperature | chlorophyll a | TP    | TN    | PO <sub>4</sub> -P | NO <sub>3</sub> -N | NH <sub>4</sub> -N | K    | Geosmin | 2-MIB | pH  | Oxidation reduction potential | Electrical conductivity | Dissolved oxygen | Total organic carbon |
|------|-------------|---------------|-------|-------|--------------------|--------------------|--------------------|------|---------|-------|-----|-------------------------------|-------------------------|------------------|----------------------|
| Unit | °C          | µg/L          | mg/L  | mg/L  | mg/L               | mg/L               | mg/L               | mg/L | ng/L    | ng/L  | —   | mV                            | mS/m                    | mg/L             | mg/L                 |
| 0    | 22.8        | 3.7           | 0.033 | 0.396 | 0.002              | 0.095              | 0.018              | 0.87 | 0.0     | 0.0   | 7.4 | 240                           | 9.8                     | 7.5              | 1.40                 |
| 7    | 20.0        | 5.3           | 0.047 | 0.535 | 0.004              | 0.193              | 0.037              | 0.95 | 0.9     | 1.3   | 7.4 | 204                           | 9.3                     | 7.6              | 1.54                 |
| 14   | 24.2        | 7.7           | 0.029 | 0.354 | 0.000              | 0.081              | 0.012              | 0.98 | 1.4     | 11.3  | 7.5 | 217                           | 9.7                     | 7.9              | 1.53                 |
| 21   | 22.8        | 2.0           | 0.050 | 0.200 | 0.000              | 0.022              | 0.000              | 0.92 | 2.1     | 32.8  | 7.8 | 214                           | 10.0                    | 8.3              | 1.97                 |
| 28   | 22.7        | 8.8           | 0.027 | 0.393 | 0.000              | 0.051              | 0.013              | 0.95 | 1.8     | 136.5 | 7.4 | 174                           | 9.5                     | 7.3              | 1.64                 |
| 33   | 23.2        | 5.9           | 0.025 | 0.335 | 0.000              | 0.011              | 0.022              | 0.94 | 1.5     | 306.1 | 7.8 | 213                           | 10.3                    | 8.4              | 1.64                 |
| 42   | 20.4        | 4.3           | 0.031 | 0.628 | 0.005              | 0.236              | 0.053              | 0.86 | 0.7     | 10.4  | 7.1 | 236                           | 8.6                     | 6.3              | 1.56                 |
| 49   | 21.4        | 7.3           | 0.025 | 0.484 | 0.003              | 0.209              | 0.018              | 0.89 | 0.5     | 3.3   | 7.3 | 221                           | 8.7                     | 7.3              | 1.60                 |
| 56   | 20.5        | 3.6           | 0.032 | 0.738 | 0.002              | 0.384              | 0.010              | 0.79 | 0.9     | 1.9   | 7.0 | 239                           | 7.6                     | 7.6              | 1.47                 |
| 63   | 23.0        | 12.0          | 0.035 | 0.641 | 0.001              | 0.209              | 0.019              | 0.75 | 0.7     | 4.6   | 6.9 | 214                           | 9.2                     | 6.1              | 1.47                 |
| 70   | 24.0        | 14.8          | 0.030 | 0.434 | 0.001              | 0.144              | 0.033              | 0.87 | 0.8     | 4.4   | 7.1 | 219                           | 8.2                     | 7.1              | 1.43                 |
| 77   | 24.8        | 10.1          | 0.031 | 0.469 | 0.004              | 0.126              | 0.046              | 0.90 | 1.3     | 10.2  | 7.5 | 221                           | 8.3                     | 7.3              | 1.65                 |
| 84   | 25.6        | 7.7           | 0.017 | 0.387 | 0.001              | 0.125              | 0.048              | 0.92 | 1.4     | 10.4  | 7.3 | 198                           | 8.5                     | 6.6              | 1.46                 |
| 91   | 25.5        | 4.2           | 0.078 | 0.854 | 0.006              | 0.295              | 0.030              | 0.86 | 1.8     | 11.1  | 7.3 | 194                           | 8.2                     | 6.8              | 2.05                 |
| 98   | 21.2        | 0.5           | 0.045 | 0.843 | 0.017              | 0.412              | 0.032              | 0.75 | 2.2     | 3.5   | 7.0 | 225                           | 5.8                     | 8.2              | 1.40                 |
| 105  | 22.5        | 5.0           | 0.022 | 0.683 | 0.006              | 0.360              | 0.013              | 0.82 | 1.3     | 1.1   | 7.1 | 219                           | 6.9                     | 7.3              | 1.15                 |
| 112  | 22.5        | 12.2          | 0.016 | 0.484 | 0.002              | 0.224              | 0.036              | 1.00 | 1.6     | 1.1   | 7.4 | 211                           | 7.7                     | 8.8              | 1.23                 |
| 119  | 22.0        | 7.9           | 0.016 | 0.343 | 0.002              | 0.144              | 0.089              | 1.33 | 1.6     | 0.6   | 7.5 | 209                           | 8.4                     | 7.7              | 1.10                 |

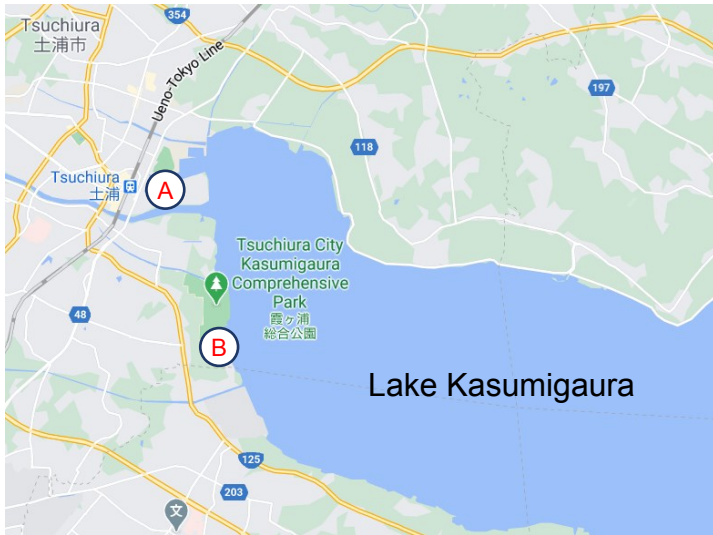

**Fig. S1** Sampling points A and B of Lake K (created using Google Map).

**Table S2** Water quality of samples collected from Lake K (29/9/2020 – 16/11/2020). “n.a.” represents data not available.

| Date                              | Code | chlorophyll a<br>(µg/L) | Temperature<br>(°C) | Electrical conductivity<br>(mS/m) |
|-----------------------------------|------|-------------------------|---------------------|-----------------------------------|
| September 29 <sup>th</sup> , 2020 | 1-A  | 108                     | 22.9                | 28.3                              |
| October 14 <sup>th</sup> , 2020   | 2-A  | 70                      | 21.2                | 19.9                              |
| October 14 <sup>th</sup> , 2020   | 2-B  | 42                      | 21                  | 25.7                              |
| November 3 <sup>rd</sup> , 2020   | 3-A  | 148                     | 17.2                | 23.7                              |
| November 3 <sup>rd</sup> , 2020   | 3-B  | 58                      | 17.4                | 26.5                              |
| November 16 <sup>th</sup> , 2020  | 4-A  | 148                     | n.a.                | n.a.                              |
| November 16 <sup>th</sup> , 2020  | 4-B  | 94                      | n.a.                | n.a.                              |

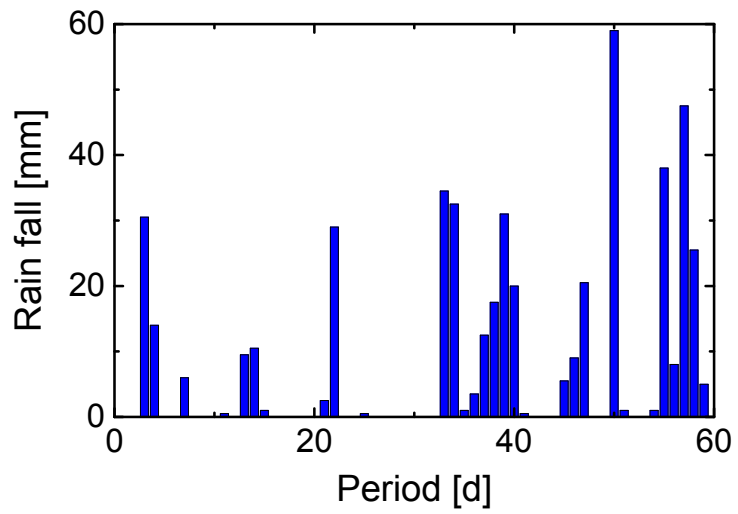

**Fig. S2** Rainfall during the assessment of Lake Y.

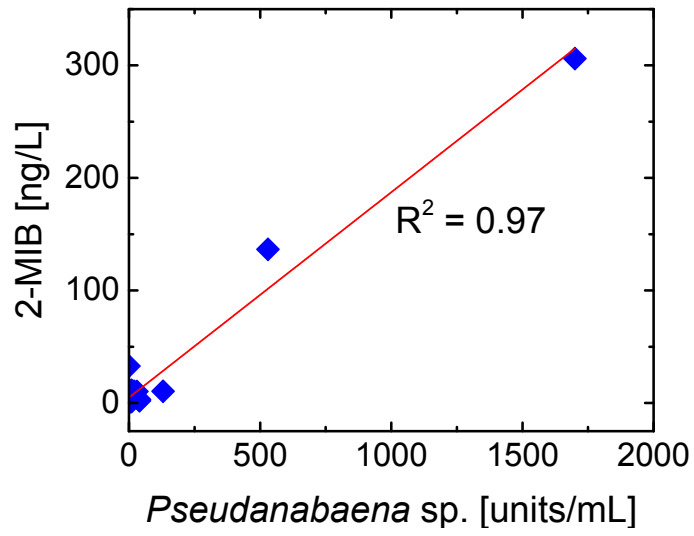

**Fig. S3** Correlation between *Pseudanabaena* sp. and 2-MIB concentrations in Lake Y.

**Table S3** Algae population (units/mL) in Lake Y.

| Day                                     | 0    | 7    | 14   | 21   | 28    | 33    | 42    | 49    | 56    | 63    | 70    | 77    | 84    | 91    | 98    | 105   | 112   | 119   |   |
|-----------------------------------------|------|------|------|------|-------|-------|-------|-------|-------|-------|-------|-------|-------|-------|-------|-------|-------|-------|---|
| <b>Cyanobacteria</b>                    |      |      |      |      |       |       |       |       |       |       |       |       |       |       |       |       |       |       |   |
| <i>Anabaeana</i>                        | 0    | 0    | 0    | 0    | 0     | 0     | 0     | 0     | 0     | 0     | 0     | 0     | 0     | 0     | 0     | 0     | 0     | 0     | 0 |
| <i>Anabaena affinis</i>                 | 0    | 0    | 0    | 0    | 0     | 0     | 0     | 0     | 0     | 0     | 0     | 0     | 0     | 0     | 0     | 0     | 0     | 0     | 0 |
| <i>Alphanocapsa</i>                     | 0    | 0    | 0    | 0    | 0     | 0     | 0     | 0     | 0     | 0     | 0     | 0     | 0     | 0     | 0     | 0     | 0     | 0     | 0 |
| <i>Chroococcus</i>                      | 0    | 0    | 0    | 0    | 0     | 0     | 0     | 0     | 0     | 0     | 0     | 0     | 0     | 0     | 0     | 0     | 0     | 0     | 0 |
| <i>Pseudanabaena limnetica</i>          | 0    | 0    | 0    | 0    | 0     | 0     | 0     | 0     | 0     | 0     | 0     | 0     | 0     | 0     | 0     | 0     | 0     | 0     | 0 |
| <i>Pseudanabaena sp.</i>                | 0    | 10   | 10   | 0    | 530   | 1700  | 130   | 40    | 40    | 30    | 20    | 30    | 20    | 0     | 0     | 0     | 0     | 0     | 0 |
| <i>Microcystis viridis</i>              | 0    | 0    | 0    | 0    | 0     | 0     | 0     | 0     | 0     | 0     | 0     | 0     | 0     | 0     | 0     | 0     | 0     | 0     | 0 |
| <i>Microcystis aeruginosa</i>           | 0    | 0    | 0    | 0    | 0     | 0     | 0     | 0     | 0     | 0     | 0     | 0     | 0     | 0     | 0     | 0     | 0     | 0     | 0 |
| Others (unicellular cyanobacteria)      | 4800 | 4750 | 3750 | 8400 | 12300 | 19000 | 11600 | 12400 | 11600 | 12300 | 13100 | 12500 | 13500 | 13100 | 19500 | 14800 | 12700 | 13000 |   |
| <b>Diatoms</b>                          |      |      |      |      |       |       |       |       |       |       |       |       |       |       |       |       |       |       |   |
| <i>Cyclotella</i>                       | 70   | 0    | 20   | 110  | 0     | 0     | 70    | 20    | 120   | 110   | 300   | 2570  | 150   | 80    | 0     | 80    | 360   | 170   |   |
| <i>Aulacoseira granulata</i>            | 0    | 0    | 0    | 0    | 0     | 0     | 0     | 10    | 0     | 20    | 30    | 20    | 0     | 0     | 0     | 0     | 20    | 0     |   |
| <i>Aulacoseira g var ang f spiralis</i> | 0    | 0    | 0    | 0    | 0     | 0     | 0     | 10    | 0     | 0     | 0     | 10    | 0     | 0     | 0     | 0     | 10    | 0     |   |
| <i>Aulacoseira distans</i>              | 0    | 0    | 0    | 0    | 0     | 0     | 0     | 0     | 0     | 0     | 0     | 0     | 30    | 20    | 0     | 0     | 640   | 190   |   |
| <i>Attheya zachariasii</i>              | 0    | 0    | 0    | 0    | 0     | 0     | 0     | 0     | 0     | 0     | 0     | 0     | 220   | 60    | 0     | 0     | 0     | 0     |   |
| <i>Fragilaria crotonensis</i>           | 0    | 0    | 0    | 0    | 10    | 0     | 0     | 0     | 0     | 20    | 60    | 20    | 0     | 0     | 0     | 0     | 0     | 0     |   |
| <i>Synedra acus</i>                     | 0    | 0    | 40   | 10   | 0     | 0     | 0     | 0     | 0     | 0     | 30    | 50    | 30    | 0     | 0     | 0     | 10    | 60    |   |
| <i>Navicula</i>                         | 10   | 60   | 80   | 270  | 140   | 150   | 210   | 800   | 100   | 100   | 70    | 80    | 0     | 10    | 0     | 60    | 10    | 10    |   |
| <i>Nitzschia</i>                        | 10   | 0    | 0    | 0    | 0     | 0     | 0     | 0     | 0     | 0     | 0     | 0     | 0     | 0     | 0     | 0     | 0     | 0     |   |
| <i>Melosira varians</i>                 | 0    | 0    | 0    | 10   | 0     | 0     | 0     | 0     | 0     | 0     | 0     | 20    | 0     | 0     | 0     | 0     | 0     | 0     |   |
| <i>Cymbella</i>                         | 0    | 0    | 40   | 10   | 0     | 20    | 0     | 0     | 0     | 0     | 0     | 10    | 0     | 10    | 0     | 0     | 0     | 0     |   |
| Others                                  | 0    | 0    | 90   | 0    | 0     | 0     | 360   | 0     | 0     | 10    | 0     | 0     | 0     | 0     | 0     | 30    | 0     | 0     |   |
| <b>Green algae</b>                      |      |      |      |      |       |       |       |       |       |       |       |       |       |       |       |       |       |       |   |
| <i>Chlamydomonas</i>                    | 10   | 60   | 110  | 20   | 30    | 0     | 30    | 50    | 80    | 180   | 70    | 50    | 90    | 110   | 0     | 30    | 30    | 50    |   |
| <i>Pleodorina</i>                       | 0    | 0    | 0    | 0    | 0     | 0     | 0     | 0     | 0     | 0     | 0     | 0     | 40    | 0     | 0     | 0     | 0     | 0     |   |
| <i>Sphaerocystis schroeteri</i>         | 0    | 0    | 0    | 0    | 90    | 0     | 0     | 0     | 0     | 30    | 0     | 0     | 50    | 190   | 0     | 0     | 0     | 160   |   |
| <i>Oocystis</i>                         | 0    | 70   | 40   | 0    | 30    | 20    | 0     | 0     | 0     | 10    | 0     | 0     | 0     | 170   | 0     | 0     | 0     | 0     |   |
| <i>Golenkinia radiata</i>               | 0    | 0    | 0    | 0    | 0     | 0     | 20    | 20    | 0     | 0     | 0     | 0     | 0     | 0     | 0     | 10    | 0     | 0     |   |
| <i>Micractinium pusillum</i>            | 0    | 20   | 20   | 0    | 0     | 0     | 0     | 0     | 0     | 0     | 0     | 0     | 0     | 0     | 0     | 0     | 0     | 0     |   |
| <i>Staurastum</i>                       | 0    | 0    | 0    | 10   | 0     | 0     | 0     | 0     | 0     | 0     | 10    | 0     | 0     | 0     | 0     | 0     | 0     | 0     |   |
| <i>Scenedesmus</i>                      | 0    | 20   | 150  | 310  | 390   | 210   | 800   | 2090  | 440   | 100   | 40    | 70    | 20    | 0     | 0     | 0     | 40    | 0     |   |
| <i>Coelastrum cambricum</i>             | 0    | 0    | 20   | 30   | 0     | 0     | 0     | 40    | 0     | 0     | 0     | 0     | 0     | 0     | 0     | 0     | 30    | 0     |   |
| <i>Cosmarium</i>                        | 0    | 0    | 10   | 0    | 0     | 0     | 0     | 0     | 0     | 20    | 0     | 0     | 0     | 20    | 10    | 0     | 0     | 0     |   |
| <i>Pediastrum duplex</i>                | 0    | 0    | 0    | 0    | 0     | 0     | 0     | 0     | 0     | 0     | 0     | 0     | 40    | 0     | 0     | 0     | 0     | 0     |   |
| <i>Crucigenia</i>                       | 0    | 0    | 50   | 0    | 0     | 0     | 0     | 0     | 0     | 0     | 0     | 0     | 0     | 0     | 0     | 0     | 0     | 0     |   |
| <i>Gleocystis</i>                       | 0    | 30   | 0    | 480  | 0     | 10    | 0     | 0     | 0     | 0     | 0     | 0     | 120   | 20    | 0     | 0     | 0     | 0     |   |
| <i>Ankistrodesmus</i>                   | 0    | 0    | 0    | 40   | 70    | 20    | 50    | 30    | 30    | 0     | 0     | 0     | 250   | 0     | 0     | 0     | 0     | 0     |   |
| <i>Eudorina</i>                         | 0    | 0    | 10   | 10   | 0     | 0     | 10    | 0     | 0     | 50    | 190   | 390   | 310   | 0     | 0     | 0     | 10    | 30    |   |
| <i>Spondylosium</i>                     | 0    | 0    | 0    | 0    | 0     | 0     | 0     | 0     | 0     | 0     | 0     | 20    | 0     | 0     | 0     | 0     | 0     | 0     |   |
| <i>Dictyosphaerium</i>                  | 0    | 0    | 0    | 0    | 0     | 0     | 0     | 0     | 0     | 0     | 0     | 0     | 0     | 0     | 0     | 0     | 20    | 10    |   |
| Others                                  | 30   | 70   | 760  | 210  | 1300  | 430   | 0     | 50    | 120   | 150   | 210   | 50    | 160   | 20    | 0     | 100   | 20    | 50    |   |
| <b>Others</b>                           |      |      |      |      |       |       |       |       |       |       |       |       |       |       |       |       |       |       |   |
| <i>Mallomonas akrokomos</i>             | 0    | 0    | 10   | 0    | 0     | 0     | 0     | 0     | 0     | 0     | 0     | 0     | 0     | 0     | 0     | 0     | 0     | 0     |   |
| <i>Mallomonas caudata</i>               | 0    | 60   | 70   | 0    | 0     | 0     | 0     | 40    | 0     | 10    | 0     | 0     | 10    | 0     | 0     | 0     | 0     | 0     |   |
| <i>Mallomonas tonsurata</i>             | 0    | 0    | 200  | 0    | 0     | 0     | 0     | 0     | 0     | 0     | 0     | 0     | 0     | 0     | 0     | 0     | 0     | 0     |   |
| <i>Botryococcus braunii</i>             | 0    | 0    | 0    | 0    | 30    | 0     | 0     | 0     | 0     | 10    | 0     | 0     | 0     | 0     | 0     | 0     | 0     | 0     |   |
| <i>Ceratium</i>                         | 0    | 10   | 10   | 10   | 0     | 0     | 0     | 0     | 0     | 0     | 0     | 0     | 10    | 0     | 0     | 0     | 0     | 0     |   |
| <i>Trachelomonas</i>                    | 60   | 170  | 120  | 40   | 20    | 0     | 40    | 30    | 20    | 30    | 10    | 10    | 0     | 60    | 10    | 20    | 0     | 10    |   |

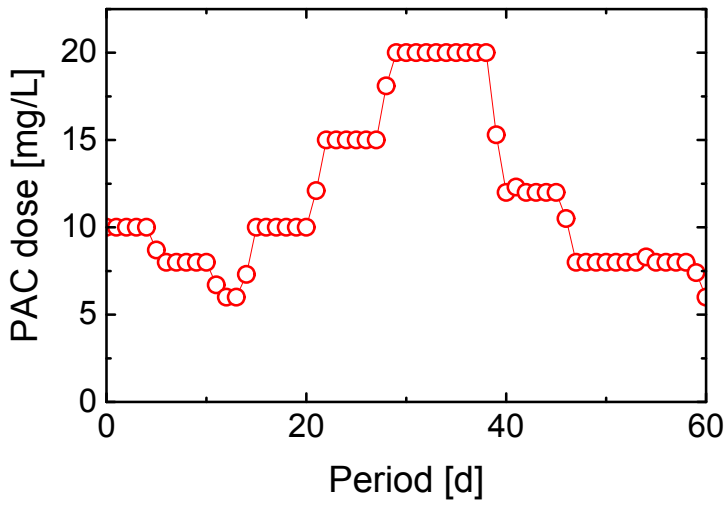

**Fig. S4** Powdered activated carbon (PAC) doses at the drinking water treatment plant during the assessment of Lake Y.



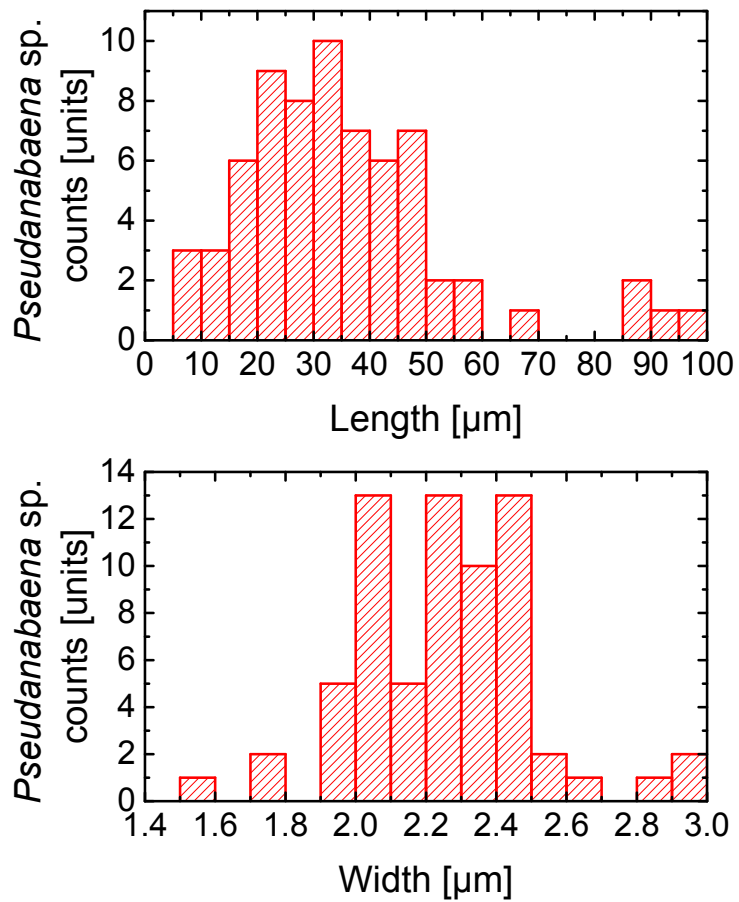

**Fig S5** (a) Length and (b) width distribution of *Pseudanabaena* sp. in a pure culture sample that were captured in bright field ( $n = 42$ ).

**Table S4** Algae population (units/mL) in Lake K.

| Date                                                            | 1-A   | 2-A   | 2-B   | 3-A   | 3-B   | 4-A   | 4-B   |
|-----------------------------------------------------------------|-------|-------|-------|-------|-------|-------|-------|
| <b>Cyanobacteria</b>                                            |       |       |       |       |       |       |       |
| <i>Anabaeana</i>                                                | 0     | 0     | 0     | 0     | 0     | 0     | 0     |
| <i>Anabaena affinis</i>                                         | 0     | 0     | 0     | 0     | 0     | 0     | 0     |
| <i>Aphanocapsa</i>                                              | 3298  | 1242  | 471   | 2655  | 1927  | 4197  | 4112  |
| <i>Merismopedia</i>                                             | 1028  | 1542  | 642   | 1713  | 4754  | 3683  | 4925  |
| <i>Microcystis</i>                                              | 0     | 0     | 0     | 0     | 0     | 0     | 514   |
| <i>Pseudanabaena</i> sp.                                        | 2827  | 771   | 728   | 385   | 899   | 300   | 557   |
| <i>Pseudanabaena limnetica</i>                                  | 728   | 43    | 43    | 43    | 214   | 171   | 171   |
| <i>Others (unicellular or unidentified cyanobacteria)</i>       | 25184 | 14904 | 19316 | 39275 | 57092 | 33965 | 67414 |
| <b>Diatoms</b>                                                  |       |       |       |       |       |       |       |
| <i>Cyclotella</i>                                               | 5696  | 2655  | 2570  | 2570  | 4069  | 5268  | 5354  |
| <i>Aulacoseira granulata</i>                                    | 814   | 385   | 214   | 86    | 86    | 43    | 43    |
| <i>A. granulata</i> var. <i>angustissima</i> f. <i>spiralis</i> | 257   | 128   | 43    | 43    | 86    | 86    | 171   |
| <i>Aulacoseira italica</i>                                      | 1842  | 600   | 514   | 343   | 43    | 514   | 600   |
| <i>Synedra</i>                                                  | 171   | 0     | 0     | 43    | 43    | 0     | 171   |
| <i>Navicula</i>                                                 | 557   | 43    | 257   | 171   | 685   | 171   | 171   |
| <i>Nitzschia</i>                                                | 985   | 428   | 385   | 857   | 1499  | 1799  | 1328  |
| <i>Others</i>                                                   | 985   | 1028  | 1371  | 1542  | 1927  | 4026  | 3212  |
| <b>Green algae</b>                                              |       |       |       |       |       |       |       |
| <i>Scenedesmus</i>                                              | 171   | 300   | 343   | 985   | 1199  | 985   | 1028  |
| <i>Ankistrodesmus</i>                                           | 86    | 514   | 128   | 771   | 1242  | 1071  | 642   |
| <i>Dictyosphaerium</i>                                          | 0     | 385   | 43    | 128   | 128   | 247   | 128   |
| <i>Shroederia</i>                                               | 0     | 0     | 43    | 43    | 43    | 0     | 43    |
| <i>Staurastum</i>                                               | 0     | 428   | 43    | 0     | 0     | 43    | 0     |
| <i>Pediastrum</i>                                               | 0     | 86    | 0     | 0     | 0     | 0     | 43    |
| <i>Others</i>                                                   | 26340 | 10023 | 13577 | 8180  | 18546 | 12463 | 12892 |

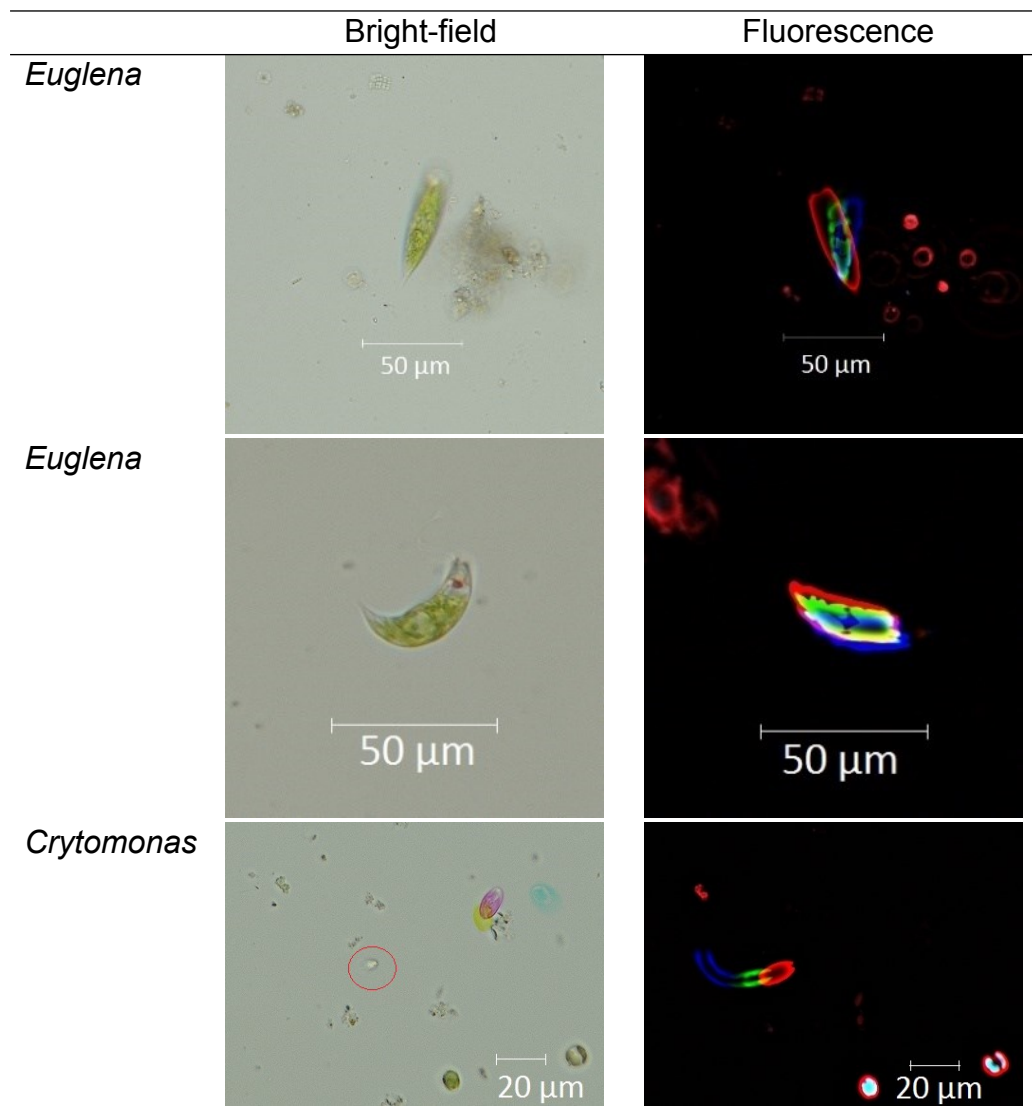

**Fig S6** Microscopic images of *Euglena* and *Cryptomonas* in bright-field observation and the path of light created by moving plankton in fluorescence observation. They were not counted in bright-field observation.

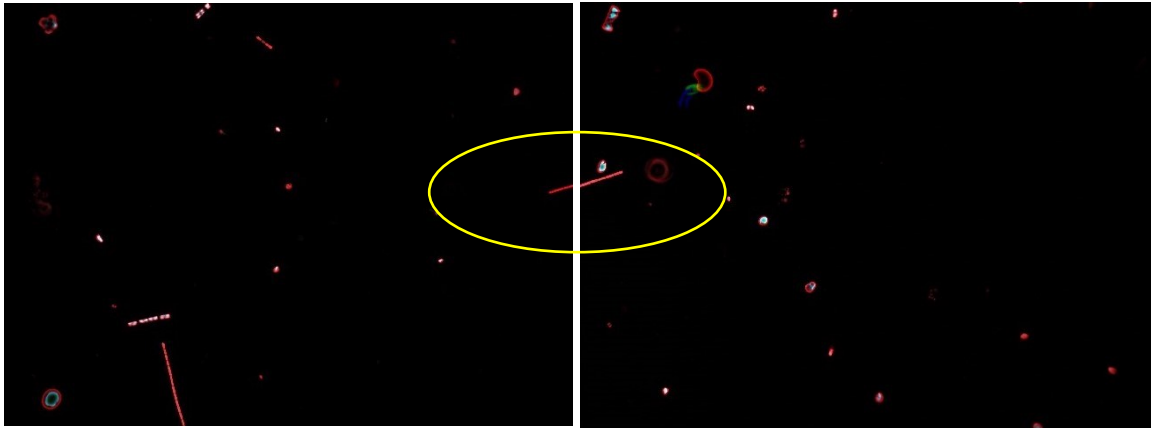

**Fig S7** A filament of *Pseudanabaena* sp. on two consecutive microscopic images in fluorescence observation: the single *Pseudanabaena* sp. was counted as two units with the developed auto-counting technique.
